# Supplementary material for: Sky-blue aggregation-induced emission molecules for non-doped organic light-emitting diodes
Source: Royal Society of Chemistry journal article supplement (doi:10.1039/c7tc01659j), 2017-01-01
Supplement: c7tc01659j1.pdf [file c7tc01659j1.pdf]

## Supporting Information

### Sky-Blue Aggregation-Induced Emission Molecules for Non-Doped Organic Light-Emitting Diodes

Dain Lo,<sup>a</sup> Chih-Hao Chang,<sup>a,\*</sup> Gintare Krucaite,<sup>b</sup> Dmytro Volyniuk,<sup>b</sup> Juozas V. Grazulevicius<sup>b</sup> and Saulius Grigalevicius<sup>b,\*</sup>

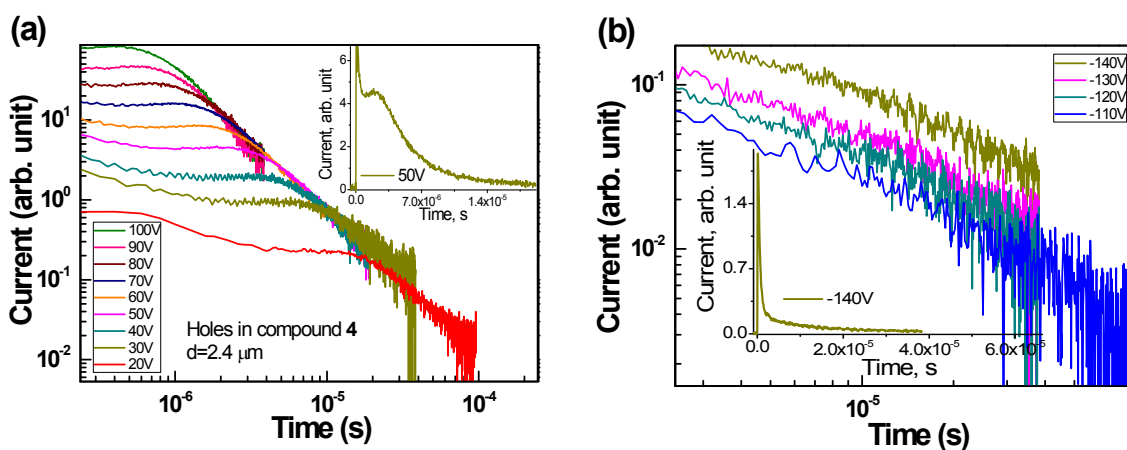

Figure S1. TOF current transients for holes (c) and electrons (d) in film of the material 4.

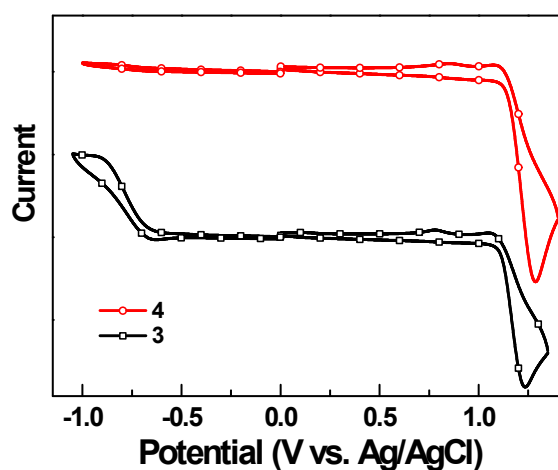

Figure S2. Cyclic voltammogram of compounds 3 and 4.

**Table S1.** Electrochemical data of compounds **3** and **4** measured at room temperature.

|          | $E_{\text{onset}}^{\text{oxi}}$ (V) <sup>a</sup> | $E_{1/2}^{\text{red}}$ (V) <sup>a</sup> | HOMO (eV) <sup>b</sup> | LUMO (eV) <sup>b</sup> | $E_g$ (eV) <sup>c</sup> |
|----------|--------------------------------------------------|-----------------------------------------|------------------------|------------------------|-------------------------|
| <b>3</b> | 1.11                                             | -0.67                                   | -5.45                  | -3.57                  | 1.88                    |
| <b>4</b> | 1.15                                             | -0.67                                   | -5.49                  | -3.58                  | 1.91                    |

<sup>a</sup>. Calculated from the onset potential. <sup>b</sup>. HOMO and LUMO were determined from the electrochemical results in CH<sub>2</sub>Cl<sub>2</sub> solution, respectively. <sup>c</sup>.  $E_g = \text{LUMO} - \text{HOMO}$  using electrochemical results.
